# Supplementary material
Source: PubMed Central journal article supplement (PMC4629831)
Supplement: NIHMS730206-supplement-Appendix.pdf [file NIHMS730206-supplement-Appendix.pdf]

## Appendix

### Reference List of Primary Studies Included in the Meta-Analysis

- Agostinelli, G., Brown, J. M., & Miller, W. R. (1995). Effects of normative feedback on consumption among heavy drinking college students. *Journal of Drug Education, 25*, 31-40. doi:10.2190/XD56-D6WR-7195-EAL3
- Allison, D. L. (2002). Comparable effects of the use of a computer-assisted, facilitative teaching approach to a traditional lecture teaching approach on college students' learning about and subsequent use of alcohol. *Dissertation Abstracts International: Section A. Humanities and Social Sciences, 64*(10), 3604. (UMI No. 3110324)
- Baer, J. S., Kivlahan, D. R., Blume, A. W., McKnight, P., & Marlatt, G. A. (2001). Brief intervention for heavy-drinking college students: 4-year follow-up and natural history. *American Journal of Public Health, 91*, 1310-1316. doi:10.2105/ajph.91.8.1310
- Bailey, K. A., Baker, A. L., Webster, R. A., & Lewin, T. J. (2004). Pilot randomized controlled trial of a brief alcohol intervention group for adolescents. *Drug and Alcohol Review, 23*, 157-166. doi:10.1080/09595230410001704136
- Bendtsen, P., McCambridge, J., Bendtsen, M., Karlsson, N., & Nilsen, P. (2012). Effectiveness of a proactive mail-based alcohol internet intervention for university students: Dismantling the assessment and feedback components in a randomized controlled trial. *Journal of Medical Internet Research, 14*(5), e142. doi:10.2196/jmir.2062
- Bernstein, J., Heeren, T., Edward, E., Dorfman, D., Bliss, C., Winter, M., & Bernstein, E. (2010). A brief motivational interview in a pediatric emergency department, plus 10-day telephone follow-up, increases attempts to quit drinking among youth and young adults who screen positive for problematic drinking. *Academic Emergency Medicine, 17*, 890-902. doi:10.1111/j.1553-2712.2010.00818.x

- Bersamin, M., Paschall, M. J., Fearnow-Kenney, M., & Wyrick, D. (2007). Effectiveness of a web-based alcohol misuse and harm-prevention course among high- and low-risk students. *Journal of American College Health, 55*, 247-254.  
doi:10.3200/JACH.55.4.247-254
- Bewick, B. M., Trusler, K., Mulhern, B., Barkham, M., & Hill, A. J. (2008). The feasibility and effectiveness of a web-based personalised feedback and social norms alcohol intervention in UK university students: A randomised control trial. *Addictive Behaviors, 33*, 1192-1198. doi:10.1016/j.addbeh.2008.05.002
- Bewick, B. M., West, R., Gill, J., O'May, F., Mulhern, B., Barkham, M., & Hill, A. J. (2010). Providing web-based feedback and social norms information to reduce student alcohol intake: A multisite investigation. *Journal of Medical Internet Research, 12*(5), e59. doi:10.2196/jmir.1461
- Bingham, C. R., Barretto, A. I., Walton, M. A., Bryant, C. M., Shope, J. T., & Raghunathan, T. E. (2010). Efficacy of a web-based, tailored, alcohol prevention/intervention program for college students: Initial findings. *Journal of American College Health, 58*, 349-356. doi:10.1080/07448480903501178
- Bingham, C. R., Barretto, A. I., Walton, M. A., Bryant, C. M., Shope, J. T., & Raghunathan, T. E. (2011). Efficacy of a web-based, tailored, alcohol prevention/intervention program for college students: 3-month follow-up. *Journal of Drug Education, 41*, 405-430. doi:10.1080/07448480903501178
- Blair, K. E. (1999). Evaluation of the effectiveness of a physician intervention program to reduce alcohol consumption among college students. *Dissertation Abstracts International: Section A. Humanities and Social Sciences, 61*(2-A), 514. (UMI No. 9960550)
- Boekeloo, B. O., Jerry, J., Lee-Ougo, W. I., Worrell, K. D., Hamburger, E. K., Russek-

- Cohen, E., & Snyder, M. H. (2004). Randomized trial of brief office-based interventions to reduce adolescent alcohol use. *Archives of Pediatrics & Adolescent Medicine*, *158*, 635–642. doi:10.1001/archpedi.158.7.635
- Borsari, B. E. (2003). Two brief alcohol interventions for referred college students. *Dissertation Abstracts International: Section B. Sciences and Engineering*, *64*(2-B), 956. (UMI No. 3081625)
- Borsari, B., & Carey, K. B. (2000). Effects of a brief motivational intervention with college student drinkers. *Journal of Consulting and Clinical Psychology*, *68*, 728-733. doi:10.1037/0022-006x.68.4.728
- Borsari, B., Hustad, J. T., Mastroleo, N. R., Tevyaw, T. O., Barnett, N. P., Kahler, C. W., . . . Monti, P. M. (2012). Addressing alcohol use and problems in mandated college students: A randomized clinical trial using stepped care. *Journal of Consulting and Clinical Psychology*, *80*, 1062-1074. doi:10.1037/a0029902
- Borsari, B., Tevyaw, T. O., Barnett, N. P., Kahler, C. W., & Monti, P. M. (2007). Stepped care for mandated college students: A pilot study. *American Journal on Addictions*, *16*, 131-137. doi:10.1080/10550490601184498
- Braitman, A. L. (2012). The effects of personalized boosters for a computerized intervention targeting college student drinking. *Dissertation Abstracts International: Section B. Sciences and Engineering*, *73*(09, E). (UMI No. 3510998)
- Butler, L. H., & Correia, C. J. (2009). Brief alcohol intervention with college student drinkers: Face-to-face versus computerized feedback. *Psychology of Addictive Behaviors*, *23*, 163-167. doi:10.1037/a0014892
- Carey, K. B., Carey, M. P., Henson, J. M., Maisto, S. A., & DeMartini, K. S. (2011). Brief alcohol interventions for mandated college students: Comparison of face-to-face counseling and computer-delivered interventions. *Addiction*, *106*, 528-537.

doi:10.1111/j.1360-0443.2010.03193.x

- Carey, K. B., Carey, M. P., Maisto, S. A., & Henson, J. M. (2006). Brief motivational interventions for heavy college drinkers: A randomized controlled trial. *Journal of Consulting and Clinical Psychology, 74*, 943-954. doi:10.1037/0022-006x.74.5.943
- Caudill, B. D., Luckey, B., Crosse, S. B., Blane, H. T., Ginexi, E. M., & Campbell, B. (2007). Alcohol risk-reduction skills training in a national fraternity: A randomized intervention trial with longitudinal intent-to-treat analysis. *Journal of Studies on Alcohol and Drugs, 68*, 399-409. Retrieved from <http://www.jsad.com/>
- Ceperich, S. D., & Ingersoll, K. S. (2011). Motivational interviewing + feedback intervention to reduce alcohol-exposed pregnancy risk among college binge drinkers: Determinants and patterns of response. *Journal of Behavioral Medicine, 34*, 381-395. doi:10.1007/s10865-010-9308-2
- Chiauzzi, E., Green, T. C., Lord, S., Thum, C., & Goldstein, M. (2005). My Student Body: A high-risk drinking prevention web site for college students. *Journal of American College Health, 53*, 263-274. doi:10.3200/jach.53.6.263-274
- Clinton-Sherrod, M., Morgan-Lopez, A. A., Brown, J. M., McMillen, B. A., & Cowell, A. (2011). Incapacitated sexual violence involving alcohol among college women: The impact of a brief drinking intervention. *Violence Against Women, 17*, 135-154. doi:10.1177/1077801210394272
- Collins, D. L. (1990). *A study of a brief alcohol education program* (Unpublished master's thesis). Francis Marion College, Florence, South Carolina.
- Collins, S. E. (2003). Weighing the pros and cons: Evaluating decisional balance as a brief motivational intervention for at-risk college drinkers. *Dissertation Abstracts International: Section B. Sciences and Engineering, 64*(11), 5775. (UMI No. 3113234)

- Collins, S. E., Carey, K. B., & Sliwinski, M. J. (2002). Mailed personalized normative feedback as a brief intervention for at-risk college drinkers. *Journal of Studies on Alcohol, 63*, 559-567. Retrieved from <http://www.jsad.com/>
- Comeau, M. N. (2003). Framing solutions: Adolescent girls and their relationships with alcohol (Doctoral dissertation, Dalhousie University, Nova Scotia, Canada). *Dissertation Abstracts International: Section B. Sciences and Engineering, 64*(09), 4601. (UMI No. NQ83702)
- Cox, J. M. (2010). A social norms approach to college alcohol use: Drinking in a low-use environment. *Dissertation Abstracts International: Section B. Sciences and Engineering, 72*(02). (UMI No. 3433393)
- Cronin, C. (1996). Harm reduction for alcohol-use-related problems among college students. *Substance Use & Misuse, 31*, 2029-2037. doi: 10.3109/10826089609066450
- Croom, K., Lewis, D., Marchell, T., Lesser, M. L., Reyna, V. F., Kubicki-Bedford, L., Feffer, M., & Staiano-Coico, L. (2009). Impact of an online alcohol education course on behavior and harm for incoming first-year college students: Short-term evaluation of a randomized trial. *Journal of American College Health, 57*, 445-454.  
doi:10.3200/jach.57.4.445-454
- Cruz, I. Y. (2006). Reducing alcohol consumption among high school students by challenging alcohol expectancies. *Dissertation Abstracts International: Section B. Sciences and Engineering, 67*(09). (UMI No. 3233876)
- Cunningham, R. M., Chermack, S. T., Zimmerman, M. A., Shope, J. T., Bingham, R., Blow, F. C., & Walton, M. A. (2012). Brief motivational interviewing intervention for peer violence and alcohol use in teens: One-year follow-up. *Pediatrics, 129*, 1083-1090.  
doi:10.1542/peds.2011-3419
- Daeppen, J.-B., Bertholet, N., Gaume, J., Fortini, C., Faouzi, M., & Gmel, G. (2011).

Efficacy of brief motivational intervention in reducing binge drinking in young men: A randomized controlled trial. *Drug and Alcohol Dependence*, 113, 69-75.

doi:10.1016/j.drugalcdep.2010.07.009

Darkes, J., & Goldman, M. S. (1998). Expectancy challenge and drinking reduction: Process and structure in the alcohol expectancy network. *Experimental and Clinical Psychopharmacology*, 6, 64-76.

Dearing, J. (2008). *Reducing alcohol-related harm through utilizing a harm prevention curriculum at the University of Central Oklahoma* (Master's thesis). Available from ProQuest Dissertations & Theses Full Text. (UMI No. 1450606)

Dempster, M., Newell, G., Cowan, G., & Marley, J. (2006). Facing up to binge drinking: Reducing binge drinking in adolescent males. *British Dental Journal*, 201, 587-590. doi:10.1038/sj.bdj.4814204

DiFulvio, G. T., Linowski, S. A., Mazziotti, J. S., & Puleo, E. (2012). Effectiveness of the Brief Alcohol and Screening Intervention for College Students (BASICS) program with a mandated population. *Journal of American College Health*, 60, 269-280. doi:10.1080/07448481.2011.599352

Dimeff, L. A. (1997). Brief intervention for heavy and hazardous college drinkers in a student primary health care setting. *Dissertation Abstracts International: Section B. Sciences and Engineering*, 58(12-B), 6805. (UMI No. 9819231)

Doumas, D. M., & Andersen, L. L. (2009). Reducing alcohol use in first-year university students: Evaluation of a web-based personalized feedback program. *Journal of College Counseling*, 12, 18-32. doi:10.1002/j.2161-1882.2009.tb00037.x

Doumas, D. M., & Hannah, E. (2008). Preventing high-risk drinking in youth in the workplace: A web-based normative feedback program. *Journal of Substance Abuse Treatment*, 34, 263-271. doi:10.1016/j.jsat.2007.04.006

- Doumas, D. M., Kane, C. M., Navarro, B., & Roman, J. (2011). Decreasing heavy drinking in first-year students: Evaluation of a web-based personalized feedback program administered during orientation. *Journal of College Counseling, 14*, 5-20.  
doi:10.1002/j.2161-1882.2011.tb00060.x
- Eggleston, A. M. (2007). Components analysis of a brief intervention for college drinkers. *Dissertation Abstracts International: Section B. Sciences and Engineering, 68*(08). (UMI No. 3276684)
- Ekman, D. S., Andersson, A., Nilsen, P., Ståhlbrandt, H., Johansson, A. L., & Bendtsen, P. (2011). Electronic screening and brief intervention for risky drinking in Swedish university students—a randomized controlled trial. *Addictive Behaviors, 36*, 654-659.  
doi:10.1016/j.addbeh.2011.01.015
- Ewing, S. W. F., LaChance, H. A., Bryan, A., & Hutchison, K. E. (2009). Do genetic and individual risk factors moderate the efficacy of motivational enhancement therapy? Drinking outcomes with an emerging adult sample. *Addiction Biology, 14*, 356-365.  
doi:10.1111/j.1369-1600.2009.00149.x
- Fischer Potts, K. A. (2002). Efficacy of the alcohol skills training program, a brief group intervention for high-risk college student drinkers. *Dissertation Abstracts International: Section B. Sciences and Engineering, 63*(06), 3006. (UMI No. 3055270)
- Fleming, M. F., Balousek, S. L., Grossberg, P. M., Mundt, M. P., Brown, D., Wiegel, J. R., Zakletskaia, L. I., & Saewyc, E. M. (2010). Brief physician advice for heavy drinking college students: A randomized controlled trial in college health clinics. *Journal of Studies on Alcohol and Drugs, 71*, 23-31. Retrieved from <http://www.jsad.com/>
- Flórez Alarcón, L. , & Gantiva Díaz, C. A. (2009). Terapias motivacionales breves: Diferencias entre la aplicación individual y grupal para la moderación del consumo de

- alcohol y de las variables psicológicas asociadas al cambio. [Brief motivational therapy: Differences between individual and group application for the moderation in alcohol consumption and other psychological variables associated with change]. *Acta Colombiana de Psicología*, 12(1), 13-26. Retrieved from <http://regweb.ucatolica.edu.co/publicaciones/psicologia/ACTA/>
- Foxcroft, D. R., Kypri, K., & Simonite, V. (2009). Bayes' Theorem to estimate population prevalence from Alcohol Use Disorders Identification Test (AUDIT) scores. *Addiction*, 104, 1132-1137. doi:10.1111/j.1360-0443.2009.02574.x
- Fried, A. (2010). *Evaluation of an expectancy challenge presentation in reducing high-risk alcohol use among Greek affiliated college students* (Unpublished master's thesis). University of Central Florida, Orlando, Florida. Retrieved from [http://etd.fcla.edu/CF/CFE0003263/Fried\\_Abigail\\_B\\_201008\\_MS.pdf](http://etd.fcla.edu/CF/CFE0003263/Fried_Abigail_B_201008_MS.pdf)
- Fromme, K., & Corbin, W. (2004). Prevention of heavy drinking and associated negative consequences among mandated and voluntary college students. *Journal of Consulting and Clinical Psychology*, 72, 1038-1049. doi:10.1037/0022-006X.72.6.1038
- Gallo, L. A. (2007). Investigating written emotional disclosure as an intervention for college student drinking. *Dissertation Abstracts International: Section B. Sciences and Engineering*, 68(07). (UMI No. 3274107)
- Gaume, J., Daepfen, J. B., & Gmel, G. (2008). *Administering brief motivational interventions to young men: Results from a pilot census study among 19 year-old francophone Swiss men*. Lausanne, Switzerland: Centre hospitalier universitaire vaudois - CHUV, Département universitaire de médecine et santé communautaires.
- Gaume, J., Gmel, G., Faouzi, M., Bertholet, N., & Daepfen, J.-B. (2011). Is brief motivational intervention effective in reducing alcohol use among young men voluntarily receiving it? A randomized controlled trial. *Alcoholism: Clinical and*

- Experimental Research*, 35, 1822-1830. doi:10.1111/j.1530-0277.2011.01526.x
- Glassman, T. (n.d.). *21st birthday social marketing intervention study in University of Florida*. Unpublished manuscript, University of Florida, Gainesville, FL.
- Glassman, T., Dodd, V., Kenzik, K., Miller, E. M., & Sheu, J.-J. (2010). Social norms vs. risk reduction approaches to 21st birthday celebrations. *American Journal of Health Education*, 41, 38-45. doi: 10.1080/19325037.2010.10599125
- Gmel, G., Venzin, V., Marmet, K., Danko, G., & Labhart, F. (2012). A quasi randomized group trial of a brief alcohol intervention on risky single occasion drinking among secondary school students. *International Journal of Public Health*, 57, 935-944. doi:10.1007/s00038-012-0419-0
- Green, P. J. (1998). Social influence and personality as moderators of the effects of psychoeducational interventions on alcohol use. *Dissertation Abstracts International: Section B. Sciences and Engineering*, 59(05), 2484. (UMI No. 9834461)
- Gregory, B. M. (2001). College alcohol and life skills study with student-athletes. *Dissertation Abstracts International: Section A. Humanities and Social Sciences*, 62(1-A), 89. (UMI No. 3001230)
- Hagger, M. S., Lonsdale, A., Koka, A., Hein, V., Pasi, H., Lintunen, T., & Chatzisarantis, N. L. (2012). An intervention to reduce alcohol consumption in undergraduate students using implementation intentions and mental simulations: A cross-national study. *International Journal of Behavioral Medicine*, 19, 82-96. doi:10.1007/s12529-011-9163-8
- Hagger, M.S., Lonsdale, A., & Chatzisarantis, N. L. D. (2012). A theory-based intervention to reduce alcohol drinking in excess of guideline limits among undergraduate students. *British Journal of Health Psychology*, 17, 18-43. doi:10.1111/j.2044-8287.2010.02011.x

- Hendershot, C. S., Otto, J. M., Collins, S. E., Liang, T., & Wall, T. L. (2010). Evaluation of a brief web-based genetic feedback intervention for reducing alcohol-related health risks associated with ALDH2. *Annals of Behavioral Medicine, 40*, 77-88.  
doi:10.1007/s12160-010-9207-3
- Henslee, A. (2008). Providing personalized feedback regarding alcohol use in a group format to college freshmen. *Dissertation Abstracts International: Section B. Sciences and Engineering, 69*(10). (UMI No. 3333129)
- Henslee, A. M., Irons, J. G., Day, J. M., Butler, L., Benson, T. A., & Correia, C. J. (2006). Using national alcohol screening day to deliver personalized feedback: A pilot study. *Journal of Drug Education, 36*, 271-278. doi:10.2190/1u8h-41u2-5k03-0j24
- Hester, R. K., Delaney, H. D., & Campbell, W. (2012). The college drinker's check-up: Outcomes of two randomized clinical trials of a computer-delivered intervention. *Psychology of Addictive Behaviors, 26*, 1-12. doi:10.1037/a0024753 \*This report provides data for two unique studies.
- Hogan, L. M. (2005). *Developing and evaluating brief, computerised interventions for excessive drinkers* (Doctoral dissertation, University of Wales, Bangor, UK). Available from ProQuest Dissertations & Theses: UK & Ireland. (UMI No. U202714)
- Horner, K. (2010). Brief motivational interviewing: An intervention for alcohol abusing college students. *Dissertation Abstracts International: Section B. Sciences and Engineering, 71*(05). (UMI No. 3402364)
- Hosier, S. G. (2002). *An evaluation of two brief interventions aimed at reducing college students' alcohol use* (Doctoral dissertation, University of Wales, Bangor, UK). Available from ProQuest Dissertations & Theses: UK & Ireland. (UMI No. U144754)
- Howat, P., Robinson, S., Binns, C., Palmer, S., & Landauer, A. (1991). Educational biofeedback driving simulator as a drink-driving prevention strategy. *Journal of*

*Alcohol and Drug Education, 37, 7-14.*

- Hunt, W. M. (2004). Effects of participant engagement on alcohol expectancies and drinking outcomes for a computerized expectancy challenge intervention. *Dissertation Abstracts International: Section B. Sciences and Engineering, 65, 6655.* (UMI No. 3157213)
- Hustad, J. T. P., Barnett, N. P., Borsari, B., & Jackson, K. M. (2010). Web-based alcohol prevention for incoming college students: A randomized controlled trial. *Addictive Behaviors, 35, 183-189.* doi:10.1016/j.addbeh.2009.10.012
- Ingersoll, K. S., Ceperich, S. D., Nettleman, M. D., Karanda, K., Brocksen, S., & Johnson, B. A. (2005). Reducing alcohol-exposed pregnancy risk in college women: Initial outcomes of a clinical trial of a motivational intervention. *Journal of Substance Abuse Treatment, 29, 173-180.* doi:10.1016/j.jsat.2005.06.003
- Ivy, K. (1998). Prevention of alcohol misuse and related violence for college students. *Dissertation Abstracts International: Section A. Humanities and Social Sciences, 59(08), 2874.* (UMI No. 9902906)
- Jewell, J., & Hupp, S. D. A. (2005). Examining the effects of fatal vision goggles on changing attitudes and behaviors related to drinking and driving. *The Journal of Primary Prevention, 26, 553-565.* doi:10.1007-s10935-005-0013-9
- Johnston, B. D., Rivara, F. P., Droesch, R. M., Dunn, C. W., & Copass, M. K. (2002). Behavior change counseling in the emergency department to reduce injury risk: A randomized, controlled trial. *Pediatrics, 110, 267-274.* doi: 10.1542/peds.110.2.267
- Jones, L. M., Silvia, L. Y., & Richman, C. L. (1995). Increased awareness and self-challenge of alcohol expectancies. *Substance Abuse, 16, 77-85.*  
doi:10.1080/08897079509444707
- Juarez, P. (2001). *A randomized trial of motivational interviewing and feedback on heavy*

*drinking college students* (Unpublished master's thesis). University of New Mexico, Albuquerque, New Mexico.

Juarez, P., Walters, S. T., Daugherty, M., & Radi, C. (2006). A randomized trial of motivational interviewing and feedback with heavy drinking college students. *Journal of Drug Education, 36*, 233-246. doi:10.2190/753n-8242-727t-g631

Kazemi, D. M., Dmochowski, J., Sun, L., Nies, M. A., & Walford, S. (2011). Outcomes of a Targeted Capacity Expansion (TCE) brief motivational intervention for high-risk drinking freshmen: Pilot study comparison at baseline and 6 months. *Alcoholism Treatment Quarterly, 29*, 219-229. doi:10.1080/07347324.2011.586275

Keillor, R. M., Perkins, W. B., & Horan, J. J. (1999). Effects of videotaped expectancy challenges on alcohol consumption of adjudicated students. *Journal of Cognitive Psychotherapy, 13*, 179-187. Retrieved from <http://www.ingentaconnect.com/content/springer/jcogp>

Kerr-Corrêa, F., Simão, M. O., & Martins, R. A. (2003). *Prevenção ao uso de álcool por estudantes universitários*. Unpublished manuscript, Universidade Estadual Paulista, São Paulo, Brazil. Retrieved from [http://fmb.unesp.br/Home/Departamentos/Neurologia,PsicologiaePsiquiatria/ViverBem/Prevencao\\_ao\\_uso\\_de\\_alcool\\_por\\_estudantes\\_universitarios.pdf](http://fmb.unesp.br/Home/Departamentos/Neurologia,PsicologiaePsiquiatria/ViverBem/Prevencao_ao_uso_de_alcool_por_estudantes_universitarios.pdf)

Koning, I. M., Vollebergh, W. A. M., Smit, F., Verdurmen, J. E. E., van den Eijnden, R. J. J. M., ter Bogt, T. F. M., . . . Engels, R. C. M. E. (2009). Preventing heavy alcohol use in adolescents (PAS): Cluster randomized trial of a parent and student intervention offered separately and simultaneously. *Addiction, 104*, 1669-1678. doi:10.1111/j.1360-0443.2009.02677.x

Kulesza, M., Apperson, M., Larimer, M. E., & Copeland, A. L. (2010). Brief alcohol intervention for college drinkers: How brief is? *Addictive Behaviors, 35*, 730-733.

doi:10.1016/j.addbeh.2010.03.011

- Kypri, K., Hallett, J., Howat, P., McManus, A., Maycock, B., Bowe, S., & Horton, N. J. (2009). Randomized controlled trial of proactive web-based alcohol screening and brief intervention for university students. *Archives of Internal Medicine*, *169*, 1508-1514. doi:10.1001/archinternmed.2009.249
- Kypri, K., McCambridge, J., Vater, T., Bowe, S. J., Saunders, J. B., Cunningham, J. A., & Horton, N. J. (2013). Web-based alcohol intervention for Maori university students: Double-blind, multi-site randomized controlled trial. *Addiction*, *108*, 331-338. doi:10.1111/j.1360-0443.2012.04067.x
- Kypri, K., Saunders, J. B., Williams, S. M., McGee, R. O., Langley, J. D., Cashell-Smith, M. L., & Gallagher, S. J. (2004). Web-based screening and brief intervention for hazardous drinking: A double-blind randomized controlled trial. *Addiction*, *99*, 1410-1417. doi:10.1111/j.1360-0443.2004.00847.x
- LaBrie, J. W. (2002). Weighing the pros and cons: A brief motivational intervention reduces risk associated with drinking and unsafe sex. *Dissertation Abstracts International: Section B. Sciences and Engineering*, *63*(12-B), 6098. (UMI No. 3074943)
- LaBrie, J. W., Huchting, K. K., Lac, A., Tawalbeh, S., Thompson, A. D., & Larimer, M. E. (2009). Preventing risky drinking in first-year college women: Further validation of a female-specific motivational-enhancement group intervention. *Journal of Studies on Alcohol and Drugs, Suppl. 16*, 77-85. Retrieved from <http://www.jsad.com/>
- LaBrie, J. W., Huchting, K., Tawalbeh, S., Pedersen, E. R., Thompson, A. D., Shelesky, K., . . . Neighbors, C. (2008). A randomized motivational enhancement prevention group reduces drinking and alcohol consequences in first-year college women. *Psychology of Addictive Behaviors*, *22*, 149-155. doi:10.1037/0893-164x.22.1.149
- LaBrie, J. W., Hummer, J. F., Neighbors, C., & Pedersen, E. R. (2008). Live interactive

group-specific normative feedback reduces misperceptions and drinking in college students: A randomized cluster trial. *Psychology of Addictive Behaviors*, 22, 141-148.  
doi:10.1037/0893-164x.22.1.141

LaBrie, J. W., Migliuri, S., & Cail, J. (2009). A night to remember: A harm-reduction birthday card intervention reduces high-risk drinking during 21st birthday celebrations. *Journal of American College Health*, 57, 659-663.  
doi:10.3200/JACH.57.6.659-663

Larimer, M. E., Turner, A. P., Anderson, B. K., Fader, J. S., Kilmer, J. R., Palmer, R. S., & Cronce, J. M. (2001). Evaluating a brief alcohol intervention with fraternities. *Journal of Studies on Alcohol*, 62, 370-380. Retrieved from <http://www.jsad.com/>

Lau-Barraco, C., & Dunn, M. E. (2008). Evaluation of a single-session expectancy challenge intervention to reduce alcohol use among college students. *Psychology of Addictive Behaviors*, 22, 168-175. doi:10.1037/0893-164x.22.2.168

Leffingwell, T. R., Leedy, M. J., & Lack, C. W. (2005, November). *A multimedia computer-based intervention for college student drinking: Short-term outcomes of a randomized trial*. Paper presented at the meeting of the Association for Behavioral and Cognitive Therapies, Washington, DC.

Lewis, M. A., & Neighbors, C. (2007). Optimizing personalized normative feedback: The use of gender-specific referents. *Journal of Studies on Alcohol and Drugs*, 68, 228-237.  
doi: 10.1037/0893-164X.22.2.176

Lewis, M. A., Neighbors, C., Lee, C. M., & Oster-Aaland, L. (2008). 21st birthday celebratory drinking: Evaluation of a personalized normative feedback card intervention. *Psychology of Addictive Behaviors*, 22, 176-185. doi:10.1037/0893-164x.22.2.176

Lewis, M. A., Neighbors, C., Oster-Aaland, L., Kirkeby, B. S., & Larimer, M. E. (2007).

Indicated prevention for incoming freshmen: Personalized normative feedback and high-risk drinking. *Addictive Behaviors*, 32, 2495-2508.

doi:10.1016/j.addbeh.2007.06.019

Lysaught, E. M. (1998). A comparison of an assessment/information based group versus an assessment only group: An investigation of drinking reduction with young adults. *Dissertation Abstracts International: Section A. Humanities and Social Sciences*, 60(2), 550-A-551-A. (UMI No. 9918230)

Magill, M., Kahler, C. W., Monti, P., & Barnett, N. P. (2012). Do research assessments make college students more reactive to alcohol events? *Psychology of Addictive Behaviors*, 26(2), 338-344. doi:10.1037/a0025571

Maio, R. F., Shope, J. T., Blow, F.C., Gregor, M. A., Zakrajsek, J. S., Weber, J. E., & Nypaver, M. M. (2005). A randomized controlled trial of an emergency department-based interactive computer program to prevent alcohol misuse among injured adolescents. *Annals of Emergency Medicine*, 45, 420-429.

doi:10.1016/j.annemergmed.2004.10.013

Marlatt, G. A., Baer, J. S., Kivlahan, D. R., Dimeff, L. A., Larimer, M. E., Quigley, L. A., . . . Williams, E. (1998). Screening and brief intervention for high-risk college student drinkers: Results from a 2-year follow-up assessment. *Journal of Consulting and Clinical Psychology*, 66, 604-615. doi:10.1037/0022-006x.66.4.604

Martell, D., & Atkin, C. (2002). *B.R.A.D. Card Survey, 2001-2002: Preliminary analysis of survey results*. East Lansing, MI: Michigan State University, Office for Survey Research, Institute for Public Policy and Social Research.

Martínez Martínez, K. I., Pedroza Cabrera, F. J., & Salazar Garza, M. L. (Eds.). (2008).

Resultados iniciales de la aplicación de consejo breve sobre el consumo de alcohol en adolescentes rurales de México [Initial results of the application of brief advice on

alcohol consumption in rural teenagers from Mexico]. *TIPICA: Boletín Electrónico de Salud Escolar*, 4(1). Retrieved from <http://www.tipica.org/>

- Martínez Martínez, K. I., Pedroza Cabrera, F. J., Salazar Garza, M. L., & Vacio Muro, M. (2010). Evaluación experimental de dos intervenciones breves para la reducción del consumo de alcohol de adolescentes [Experimental evaluation of two brief interventions for the reduction of alcohol consumption in teenagers]. *Revista Mexicana De Análisis De La Conducta*, 36, 35-53. doi:10.5514/rmac.v36.i3.03
- Martínez Martínez, K. I., Pedroza Cabrera, F. J., Vacío Muro, M. A., Jiménez Pérez, A. L., & Salazar Garza, M. L. (2008). Consejo breve para adolescentes escolares que abusan del alcohol. [School-based brief counseling for teenage drinkers]. *Revista Mexicana de Análisis de la Conducta*, 34, 245-262.
- Martins, R. A., Manzato, A. J., Poiate, S. M. G., Scarin, A. C. C. F., Nogueira da Cruz, L. A., Teixeira, P. S., & Kawashima, R. A. (2008, June). *Alcohol usage and brief intervention in heavy-drinking teenagers*. Paper presented at the meeting of the 34th Annual Alcohol Epidemiology Symposium of the Kettil Bruun Society, Victoria, BC, Canada.
- Mastroleo, N. (2008). Comparison of supervision training techniques in a motivational enhancement intervention on college student drinking. *Dissertation Abstracts International: Section A. Humanities and Social Sciences*, 69(11). (UMI No. 3336087)
- Mayhew, M. J., Caldwell, R. J., & Hourigan, A. J. (2008). The influence of curricular-based interventions within first-year "success" courses on student alcohol expectancies and engagement in high-risk drinking behaviors. *NASPA Journal*, 45, 49-72.
- Mayhew, M. J., Caldwell, R., Hourigan, A., Bezbatchenko, A. W., & Fried, M. (2010). *Intervention deliveries: The role of peer educators in reducing high-risk drinking*

*among first-year students*. Unpublished manuscript, New York University, New York, NY.

- Mayhew, M. J., Klein, S., Behringer, L. B., Ulrich, A. S., Caldwell, R. J., & Hourigan, A. (2011). Curricular infusion and high-risk drinking among first-year students. *Journal of the First Year Experience & Students in Transition*, 23, 9-34.
- McNally, A. M. (2003). Motivational interventions for problematic alcohol use: In search of the mechanisms of action. *Dissertation Abstracts International: Section B. Sciences and Engineering*, 63(10-B), 4914. (UMI No. 3067197)
- McNally, A. M., & Palfai, T. P. (2003). Brief group alcohol interventions with college students: Examining motivational components. *Journal of Drug Education*, 33, 159-176. doi:10.2190/82ct-lrc5-amtw-c090
- McPherson, P. (2012). *Efficacy of brief alcohol interventions in an Australian tertiary education setting* (Doctoral dissertation, Royal Melbourne Institute of Technology University, Melbourne, Australia). Retrieved from <http://researchbank.rmit.edu.au/view/rmit:160203>
- Michael, K. D., Curtin, L., Kirkley, D. E., Jones, D. L., & Harris Jr., R. (2006). Group-based motivational interviewing for alcohol use among college students: An exploratory study. *Professional Psychology: Research and Practice*, 37, 629-634. doi:10.1037/0735-7028.37.6.629
- Mignogna, J. (2010). A test of moderating factors of brief interventions for hazardous alcohol use among college students. *Dissertation Abstracts International: Section B. Sciences and Engineering*, 71(10). (UMI No. 3422281)
- Miller, E. T. (2000). Preventing alcohol abuse and alcohol-related negative consequences among freshmen college students: Using emerging computer technology to deliver and evaluate the effectiveness of brief intervention efforts. *Dissertation Abstracts*

*International: Section B. Sciences and Engineering*, 61(8-B), 4417. (UMI No. 9983525)

Moreira, M. T., Oskrochi, R., & Foxcroft, D. R. (2012). Personalised normative feedback for preventing alcohol misuse in university students: Solomon three-group randomised controlled trial. *PLOS One*, 7(9), e44120. doi:10.1371/journal.pone.0044120

Mundt, M. (2007). College alcohol abuse and alcohol related harms. *Dissertation Abstracts International: Section B. Sciences and Engineering*, 68(12). (UMI No. 3294169)

Murgraff, V., McDermott, M., & Abraham, C. (2006). *An evaluation of an action-planning intervention to reduce the incidence of high-risk single-session alcohol consumption in high risk drinkers*. London, UK: Alcohol Education and Research Council.

Murphy, J. G., Dennhardt, A. A., Skidmore, J. R., Martens, M. P., & McDevitt-Murphy, M. E. (2010). Computerized versus motivational interviewing alcohol interventions: Impact on discrepancy, motivation, and drinking. *Psychology of Addictive Behaviors*, 24, 628-639. doi:10.1037/a0021347

Murphy, J. G., Duchnick, J. J., Vuchinich, R. E., Davison, J. W., Karg, R. S., Olson, A. M., . . . Coffey, T. T. (2001). Relative efficacy of a brief motivational intervention for college student drinkers. *Psychology of Addictive Behaviors*, 15, 373-379. doi:10.1037/0893-164x.15.4.373

Mushquash, C. J. (2011). *Personality and motives for alcohol use in aboriginal adolescents: A culturally relevant approach to alcohol abuse early intervention* (Unpublished doctoral dissertation, Dalhousie University, Nova Scotia, Canada). Retrieved from <http://hdl.handle.net/10222/14241>

Neal, D. J., & Carey, K. B. (2004). Developing discrepancy within self-regulation theory: Use of personalized normative feedback and personal strivings with heavy-drinking college students. *Addictive Behaviors*, 29, 281-297. doi:10.1016/j.addbeh.2003.08.004

- Neighbors, C., Jensen, M., Tidwell, J., Walter, T., Fossos, N., & Lewis, M. A. (2011). Social-norms interventions for light and nondrinking students. *Group Processes & Intergroup Relations, 14*, 651-669. doi:10.1177/1368430210398014
- Neighbors, C., Larimer, M. E., & Lewis, M. A. (2004). Targeting misperceptions of descriptive drinking norms: Efficacy of a computer-delivered personalized normative feedback intervention. *Journal of Consulting and Clinical Psychology, 72*, 434-447. doi:10.1037/0022-006x.72.3.434
- Neighbors, C., Lee, C. M., Atkins, D. C., Lewis, M. A., Kaysen, D., Mittmann, A., . . . Larimer, M. E. (2012). A randomized controlled trial of event-specific prevention strategies for reducing problematic drinking associated with 21st birthday celebrations. *Journal of Consulting and Clinical Psychology, 80*, 850-862. doi:10.1037/a0029480
- Neighbors, C., Lee, C. M., Lewis, M. A., Fossos, N., & Walter, T. (2009). Internet-based personalized feedback to reduce 21st-birthday drinking: A randomized controlled trial of an event-specific prevention intervention. *Journal of Consulting and Clinical Psychology, 77*, 51-63. doi:10.1037/a0014386
- Neighbors, C., Lewis, M. A., Atkins, D. C., Jensen, M. M., Walter, T., Fossos, N., . . . Larimer, M. E. (2010). Efficacy of web-based personalized normative feedback: A two-year randomized controlled trial. *Journal of Consulting and Clinical Psychology, 78*, 898-911. doi:10.1037/a0020766
- Neighbors, C., Lewis, M. A., Bergstrom, R. L., & Larimer, M. E. (2006). Being controlled by normative influences: Self-determination as a moderator of a normative feedback alcohol intervention. *Health Psychology, 25*, 571-579. doi:10.1037/0278-6133.25.5.571
- Neighbors, C., Spieker, C. J., Oster-Aaland, L., Lewis, M. A., & Bergstrom, R. L. (2005).

- Celebration intoxication: An evaluation of 21st birthday alcohol consumption. *Journal of American College Health*, 54, 76-80. doi: 10.3200/JACH.54.2.76-80
- Ostafin, B. D. (2004). Affective learning and alcohol consumption: Correlates of risk and causes of change. *Dissertation Abstracts International: Section B. Sciences and Engineering*, 65(03), 1559. (UMI No. 3124866)
- Ostafin, B. D., & Palfai, T. P. (2012). When wanting to change is not enough: Automatic appetitive processes moderate the effects of a brief alcohol intervention in hazardous-drinking college students. *Addiction Science & Clinical Practice*, 7, 7-25. doi:10.1186/1940-0640-7-25
- Palfai, T. P., Zisserson, R., & Saitz, R. (2011). Using personalized feedback to reduce alcohol use among hazardous drinking college students: The moderating effect of alcohol-related negative consequences. *Addictive Behaviors*, 36, 539-542. doi:10.1016/j.addbeh.2011.01.005
- Paschall, M. J., Antin, T., Ringwalt, C. L., & Saltz, R. F. (2011). Effects of AlcoholEdu for college on alcohol-related problems among freshmen: A randomized multicampus trial. *Journal of Studies on Alcohol and Drugs*, 72, 642-650. Retrieved from <http://www.jsad.com/>
- Paschall, M. J., Bersamin, M., Fearnow-Kenney, M., Wyrick, D., & Currey, D. (2006). Short-term evaluation of a Web-based college alcohol misuse and harm prevention course (College Alc). *Journal of Alcohol and Drug Education*, 50, 49-65.
- Patel, A. B. (2011). An experimental test of collegiate drinking norms. *Dissertation Abstracts International: Section B. Sciences and Engineering*, 73(01). (UMI No. 3479973)
- Pedersen, E. R. (2012). Brief online interventions targeting risk and protective factors for increased and problematic alcohol use among American college students studying abroad. *Dissertation Abstracts International: Section B. Sciences and Engineering*,

74(03, E). (UMI No. 3542377)

Peeler, C. M., Far, J. M., Miller, J. A., & Brigham, T. A. (2000). An analysis of the effects of a program to reduce heavy drinking among college students. *Journal of Alcohol and Drug Education, 45*, 39-54.

Pensuksan, W. C., Taneepanichskul, S., & Williams, M. A. (2010). A peer-drinking group motivational intervention among Thai male undergraduate students. *International Journal of Drug Policy, 21*, 432-436. doi:10.1016/j.drugpo.2010.02.005

Quigley, C. F. (2010). *A psychosocial model of drinking amongst young people and the effects of brief interventions* (Doctoral dissertation, University of Sheffield, England). Available from ProQuest Dissertations and Theses database. (UMI No. U557325)

\*This report provides data for two unique studies.

Reilly, D. W., & Wood, M. D. (2008). A randomized test of a small-group interactive social norms intervention. *Journal of American College Health, 57*, 53-60.  
doi:10.3200/jach.57.1.53-60

Reynolds, K. D., Coombs, D. W., Lowe, J. B., Peterson, P. L., & Gayoso, E. (1995). Evaluation of a self-help program to reduce alcohol consumption among pregnant women. *International Journal of the Addictions, 30*, 427-443.

Schaus, J. F., Sole, M. L., McCoy, T. P., Mullett, N., & O'Brien, M. C. (2009). Alcohol screening and brief intervention in a college student health center: A randomized controlled trial. *Journal of Studies on Alcohol and Drugs, Suppl. 16*, 131-141.  
Retrieved from <http://www.jsad.com/>

Schreiner, A. M. (2010). *Evaluation of an expectancy challenge curriculum in reducing high risk alcohol use among college students when modified for large classes* (Unpublished master's thesis). University of Central Florida, Orlando, Florida.  
Retrieved from

[http://etd.fcla.edu/CF/CFE0003114/Schreiner\\_Amy\\_M\\_201005\\_MS.pdf](http://etd.fcla.edu/CF/CFE0003114/Schreiner_Amy_M_201005_MS.pdf)

Segatto, M. L. (2008, October). *A efetividade da intervenção breve motivacional em jovens atendidos no pronto socorro após um evento relacionado ao consumo de álcool.*

Paper presented at the meeting of the International Network on Brief Interventions for Alcohol Problems, Ribeirão Preto, Brazil.

Sharmer, L. (2001). Evaluation of alcohol education programs on attitude, knowledge, and self-reported behavior of college students. *Evaluation & the Health Professions*, 24, 336-357. doi:10.1177/01632780122034957

Simão, M. O. (2005). *Avaliação da eficácia da intervenção breve para redução de danos em estudantes universitários da Unesp que fazem uso excessivo de bebidas alcoólicas [Assessment of the effectiveness of brief intervention to reduce harm in university students of UNESP who use alcohol excessively]* (Doctoral dissertation, Universidade de São Paulo, Ribeirão Preto, Brazil). Retrieved from <http://bases.bireme.br/cgi-bin/wxislind.exe/iah/online/?IsisScript=iah/iah.xis&src=google&base=ADOLEC&lang=p&nextAction=lnk&exprSearch=468382&indexSearch=ID>

Simão, M. O., Kerr-Corrêa, F., Smaira, S. I., Trinca, L. A., Floripes, T. M. F., Dalben, I., . . . Tucci, A. M. (2008). Prevention of "risky" drinking among students at a Brazilian university. *Alcohol and Alcoholism*, 43, 470-476. doi:10.1093/alcalc/agn019

Sivasithamparam, J., (2008). *Implementation and evaluation of a classroom-based approach to expectancy challenge for reducing alcohol use among college students* (Unpublished master's thesis). University of Central Florida, Orlando, Florida. Retrieved from <http://purl.fcla.edu/fcla/etd/CFE0002307>

Smith, B. H. (2004). A randomized study of a peer-led, small group social norming intervention designed to reduce drinking among college students. *Journal of Alcohol and Drug Education*, 47, 67-75.

- Smith, B. H., Bogle, K. E., Talbott, L., Gant, R., & Castillo, H. (2006). A randomized study of four cards designed to prevent problems during college students' 21st birthday celebrations. *Journal of Studies on Alcohol*, 67, 607-615. Retrieved from <http://www.jsad.com/>
- Spijkerman, R., Roek, M. A., Vermulst, A., Lemmers, L., Huiberts, A., & Engels, R. C. (2010). Effectiveness of a Web-based brief alcohol intervention and added value of normative feedback in reducing underage drinking: A randomized controlled trial. *Journal of Medical Internet Research*, 12(5), e65. doi:10.2196/jmir.1465
- Spirito, A., Monti, P. M., Barnett, N. P., Colby, S. M., Sindelar, H., Rohsenow, D. J., . . . Myers, M. (2004). A randomized clinical trial of a brief motivational intervention for alcohol-positive adolescents treated in an emergency department. *Journal of Pediatrics*, 145, 396-402. doi:10.1016/j.jpeds.2004.04.057
- Stachula, J. P. (2004). A social norming based proactive intervention for college student alcohol use. *Dissertation Abstracts International: Section B. Sciences and Engineering*, 65(6-B), 3184. (UMI No. 3135853)
- Ståhlbrandt, H., Johnsson, K. O., & Berglund, M. (2007). Two-year outcome of alcohol interventions in Swedish university halls of residence: A cluster randomized trial of a brief skills training program, twelve-step-influenced intervention, and controls. *Alcoholism: Clinical and Experimental Research*, 31, 458-466. doi:10.1111/j.1530-0277.2006.00327.x
- Stamper, G. A. (2006). The evaluation of program fidelity in two college alcohol interventions. *Dissertation Abstracts International: Section B. Sciences and Engineering*, 67(09). (UMI No. 3232540)
- Stamper, G. A., Smith, B. H., Gant, R., & Bogle, K. E. (2004). Replicated findings of an evaluation of a brief intervention designed to prevent high-risk drinking among first-

- year college students: Implications for social norming theory. *Journal of Alcohol and Drug Education*, 48, 53-72.
- Steffian, G. (1997). Correction of normative misperceptions: An alcohol abuse prevention program. *Dissertation Abstracts International: Section B. Sciences and Engineering*, 59(1-B), 429. (UMI No. 9821478)
- Sugarman, D. E. (2009). *Web-based alcohol feedback intervention for heavy drinking college students: Does drinking control strategy use mediate intervention effects?* (Doctoral dissertation). Retrieved from [http://surface.syr.edu/psy\\_etd/8](http://surface.syr.edu/psy_etd/8) (UMI No. 3385859)
- Sugarman, D. E., & Carey, K. B. (2009). Drink less or drink slower: The effects of instruction on alcohol consumption and drinking control strategy use. *Psychology of Addictive Behaviors*, 23, 577-585. doi:10.1037/a0016580
- Terlecki, M. (2011). *The long-term effect of a brief motivational alcohol intervention for heavy drinking mandated college students* (Unpublished doctoral dissertation). Louisiana State University, Baton Rouge, Louisiana.
- Terlecki, M. A., Buckner, J. D., Larimer, M. E., & Copeland, A. L. (2011). The role of social anxiety in a brief alcohol intervention for heavy-drinking college students. *Journal of Cognitive Psychotherapy*, 25, 7-21. doi:10.1891/0889-8391.25.1.7
- Terry, D. L. (2012). Screening and brief intervention for hazardous alcohol use: A pilot study in a college counseling center. *Dissertation Abstracts International: Section B. Sciences and Engineering*, 74(02, E). (UMI No. 3527869)
- Thush, C., Wiers, R. W., Moerbeek, M., Ames, S. L., Grenard, J. L., Sussman, S., & Stacy, A. W. (2009). Influence of motivational interviewing on explicit and implicit alcohol-related cognition and alcohol use in at-risk adolescents. *Psychology of Addictive Behaviors*, 23, 146-151. doi:10.1037/a0013789
- Turrisi, R., Larimer, M. E., Mallett, K. A., Kilmer, J. R., Ray, A. E., Mastroleo, N. R., . . .

- Montoya, H. (2009). A randomized clinical trial evaluating a combined alcohol intervention for high-risk college students. *Journal of Studies on Alcohol and Drugs*, 70, 555-567. Retrieved from <http://www.jsad.com/>
- Voogt, C. V., Poelen, E. A. P., Kleinjan, M., Lemmers, L. A. C. J., & Engels, R. C. M. E. (2013). The effectiveness of the 'What Do You Drink' web-based brief alcohol intervention in reducing heavy drinking among students: A two-arm parallel group randomized controlled trial. *Alcohol and Alcoholism* 48, 312-321. doi: 10.1093/alcalc/ags133
- Wagener, T. L. (2010). Genuine vs. DrAFT-CS: A randomized trial comparing computer and live personalized feedback interventions for high-risk drinking among college students. *Dissertation Abstracts International: Section B. Sciences and Engineering*, 73(07, E). (UMI No. 3498642)
- Wagener, T. L., Leffingwell, T. R., Mignogna, J., Mignogna, M. R., Weaver, C. C., Cooney, N. J., & Claborn, K. R. (2012). Randomized trial comparing computer-delivered and face-to-face personalized feedback interventions for high-risk drinking among college students. *Journal of Substance Abuse Treatment*, 43, 260-267.  
doi:10.1016/j.jsat.2011.11.001
- Walters, S. T. (2000). In praise of feedback: An effective intervention for college students who are heavy drinkers. *Journal of American College Health*, 48, 235-238.  
doi:10.1080/07448480009599310
- Walters, S. T., Bennett, M. E., & Miller, J. H. (2000). Reducing alcohol use in college students: A controlled trial of two brief interventions. *Journal of Drug Education*, 30, 361-372. doi:10.2190/jhml-0jpd-ye71-14ct
- Walters, S. T., Vader, A. M., & Harris, T. R. (2007). A controlled trial of Web-based feedback for heavy drinking college students. *Prevention Science*, 8, 83-88.

doi:10.1007/s11121-006-0059-9

Walters, S. T., Vader, A. M., Harris, T. R., Field, C. A., & Jouriles, E. N. (2009).

Dismantling motivational interviewing and feedback for college drinkers: A randomized clinical trial. *Journal of Consulting and Clinical Psychology, 77*, 64-73.

doi:10.1037/a0014472

Walton, M. A., Chermack, S. T., Shope, J. T., Bingham, C. R., Zimmerman, M. A., Blow, F.

C., & Cunningham, R. M. (2010). Effects of a brief intervention for reducing violence and alcohol misuse among adolescents: A randomized controlled trial. *JAMA, 304*,

527-535. doi:10.1001/jama.2010.1066

Weaver, C. C. (2011). A randomized controlled trial comparing a computer-based

personalized feedback intervention with and without a moderation skills module.

*Dissertation Abstracts International: Section B. Sciences and Engineering, 73*(01).

(UMI No. 3474706)

Weitzel, J. A., Bernhardt, J. M., Usdan, S., Mays, D., & Glanz, K. (2007). Using wireless

handheld computers and tailored text messaging to reduce negative consequences of drinking alcohol. *Journal of Studies on Alcohol and Drugs, 68*, 534-537. Retrieved

from <http://www.jsad.com/>

Werch, C. E., Anzalone, D. M., Brokiewicz, L. M., Felker, J., Carlson, J. M., & Castellon-

Vogel, E. A. (1996). An intervention for preventing alcohol use among inner-city middle school students. *Archives of Family Medicine, 5*, 146-152. doi:

10.1001/archfami.5.3.146

Werch, C. E., Carlson, J. M., Pappas, D. M., Edgemon, P., & DiClemente, C. C. (2002). A

brief alcohol preventive intervention for student athletes. *Prevention Researcher, 9*, 4-5.

Werch, C. E., Moore, M. M., Diclemente, C. C., Owen, D. M., Carlson, J. M., & Jobli, E.

- (2005). Single vs. multiple drug prevention: Is more always better? A pilot study. *Substance Use & Misuse, 40*, 1085-1101. doi:10.1081/ja-200030814
- Werch, C., Jobli, E., Moore, M. J., DiClemente, C. C., Dore, H., & Brown, C. H. (2005). A brief experimental alcohol beverage-tailored program for adolescents. *Journal of Studies on Alcohol, 66*, 284-290. Retrieved from <http://www.jsad.com/>
- White, H. R., Mun, E. Y., & Morgan, T. J. (2008). Do brief personalized feedback interventions work for mandated students or is it just getting caught that works? *Psychology of Addictive Behaviors, 22*, 107-116. doi:10.1037/0893-164x.22.1.107
- Whiteside, U. (2010). A brief personalized feedback intervention integrating a motivational interviewing therapeutic style and dialectical behavioral therapy skills for depressed or anxious heavy drinking young adults. *Dissertation Abstracts International: Section B. Sciences and Engineering, 71*(12). (UMI No. 3431523)
- Wiers, R. W., & Kummeling, R. H. C. (2004). An experimental test of an alcohol expectancy challenge in mixed gender groups of young heavy drinkers. *Addictive Behaviors, 29*, 215–220. doi:10.1016/S0306-4603(03)00081-9
- Winters, K. C., Fahnhorst, T., Botzet, A., Lee, S., & Lalone, B. (2012). Brief intervention for drug-abusing adolescents in a school setting: Outcomes and mediating factors. *Journal of Substance Abuse Treatment, 42*, 279-288. doi:10.1016/j.jsat.2011.08.005
- Wood, M. D., Capone, C., Laforge, R., Erickson, D. J., & Brand, N. H. (2007). Brief motivational intervention and alcohol expectancy challenge with heavy drinking college students: A randomized factorial study. *Addictive Behaviors, 32*, 2509-2528. doi:10.1016/j.addbeh.2007.06.018
- Wood, M. D., Fairlie, A. M., Fernandez, A. C., Borsari, B., Capone, C., Laforge, R., & Carmona-Barros, R. (2010). Brief motivational and parent interventions for college students: A randomized factorial study. *Journal of Consulting and Clinical*

*Psychology*, 78, 349-361. doi:10.1037/a0019166

Wooten, B. T. (1995). Challenging alcohol expectancies: An application to adolescents.

*Dissertation Abstracts International: Section B. Sciences and Engineering*, 56(12-B), 706056. (UMI No. 9610329)

Zhang, Y. (2009). Effects of an alcohol education program for high school students in

Wuhan, China. *Dissertation Abstracts International: Section A. Humanities and Social Sciences*, 70(30). (UMI No. 3350261)

## Reporting Characteristics of Primary Studies Included in the Meta-Analysis

| First author    | Year | RCT | ITT | Attrition | Study waves | Age group | Journal article | Identification source | English report | Funded | Time lag | Number of reports | Citations per year | Impact factor |
|-----------------|------|-----|-----|-----------|-------------|-----------|-----------------|-----------------------|----------------|--------|----------|-------------------|--------------------|---------------|
| Agostinelli     | 1995 | Y   | N   | 0.08      | 1           | YA        | Y               | Main database         | Y              | N      | .        | 1                 | 17.28              | 0.61          |
| Allison         | 2002 | N   | N   | 0.00      | 1           | YA        | N               | Reference list        | Y              | N      | 0        | 1                 | 0.09               | 0.00          |
| Baer            | 2001 | Y   | Y   | 0.16      | 5           | YA        | Y               | Main database         | Y              | Y      | 7        | 4                 | 30.00              | 3.03          |
| Bailey          | 2004 | Y   | Y   | 0.00      | 3           | YA        | Y               | Main database         | Y              | N      | 4        | 1                 | 5.11               | 1.10          |
| Bendtsen        | 2012 | Y   | Y   | 0.60      | 1           | YA        | Y               | Other                 | Y              | Y      | 2        | 1                 | 1.00               | 3.77          |
| Bernstein       | 2010 | Y   | N   | 0.29      | 2           | YA        | Y               | Main database         | Y              | Y      | 1        | 1                 | 5.67               | 2.20          |
| Bersamin        | 2007 | Y   | N   | 0.43      | 1           | YA        | Y               | Reference list        | Y              | Y      | .        | 2                 | 7.50               | 1.94          |
| Bewick          | 2008 | Y   | N   | 0.74      | 1           | YA        | Y               | Main database         | Y              | Y      | .        | 1                 | 12.60              | 1.85          |
| Bewick          | 2010 | Y   | Y   | 0.13      | 2           | YA        | Y               | Main database         | Y              | Y      | 3        | 2                 | 4.33               | 4.66          |
| Bingham         | 2010 | Y   | N   | 0.27      | 2           | YA        | Y               | Main database         | Y              | Y      | 3        | 4                 | 2.67               | 1.57          |
| Bingham         | 2011 | Y   | N   | 0.39      | 2           | YA        | Y               | Main database         | Y              | Y      | 3        | 4                 | 0.00               | 0.57          |
| Blair           | 1999 | N   | N   | 0.74      | 1           | YA        | N               | Main database         | Y              | N      | 1        | 1                 | 0.00               | 0.00          |
| Boekeloo        | 2004 | Y   | Y   | 0.10      | 2           | AD        | Y               | Reference list        | Y              | Y      | 3        | 2                 | 2.00               | 2.89          |
| Borsari         | 2000 | Y   | N   | 0.00      | 1           | YA        | Y               | Main database         | Y              | Y      | 1        | 2                 | 32.92              | 4.39          |
| Borsari         | 2003 | Y   | N   | 0.11      | 2           | YA        | Y               | Main database         | Y              | Y      | 3        | 2                 | 0.38               | 0.00          |
| Borsari         | 2007 | Y   | N   | 0.00      | 1           | YA        | Y               | Main database         | Y              | Y      | 2        | 2                 | 4.00               | 1.12          |
| Borsari         | 2012 | Y   | N   | 0.13      | 4           | YA        | N               | Other                 | Y              | Y      | 1        | 1                 | 1.00               | 5.01          |
| Braitman        | 2012 | Y   | N   | 0.58      | 2           | YA        | N               | Main database         | Y              | N      | .        | 1                 | 0.00               | 0.00          |
| Butler          | 2009 | Y   | N   | 0.23      | 1           | YA        | Y               | Main database         | Y              | N      | .        | 2                 | 4.67               | 2.24          |
| Carey           | 2006 | Y   | Y   | 0.01      | 3           | YA        | Y               | Main database         | Y              | Y      | 3        | 4                 | 16.71              | 4.03          |
| Carey           | 2011 | Y   | N   | 0.05      | 3           | YA        | Y               | Main database         | Y              | Y      | 3        | 2                 | 9.50               | 4.31          |
| Caudill         | 2007 | Y   | Y   | 0.47      | 3           | YA        | Y               | Main database         | Y              | Y      | 5        | 1                 | 2.50               | 2.09          |
| Ceperich        | 2011 | Y   | N   | 0.11      | 2           | YA        | Y               | Main database         | Y              | Y      | .        | 2                 | 0.88               | 1.54          |
| Chiauzzi        | 2005 | Y   | Y   | 0.20      | 2           | YA        | Y               | Main database         | Y              | Y      | .        | 1                 | 15.50              | 1.00          |
| Clinton-Sherrod | 2011 | Y   | N   | 0.13      | 1           | YA        | Y               | Main database         | Y              | Y      | 2        | 4                 | 1.50               | 1.33          |
| Collins         | 1990 | Y   | N   | 0.00      | 2           | AD        | Y               | Reference list        | Y              | N      | .        | 3                 | 0.00               | 0.00          |
| Collins         | 2002 | Y   | N   | 0.33      | 2           | YA        | Y               | Main database         | Y              | Y      | .        | 2                 | 13.73              | 1.16          |

|                |      |   |   |      |   |    |   |                |   |   |   |   |       |      |
|----------------|------|---|---|------|---|----|---|----------------|---|---|---|---|-------|------|
| Collins        | 2003 | Y | N | 0.02 | 2 | YA | N | Main database  | Y | Y | 1 | 2 | 0.50  | 0.00 |
| Comeau         | 2003 | Y | Y | 0.04 | 1 | AD | N | Main database  | Y | Y | . | 1 | 0.50  | 0.00 |
| Cox            | 2010 | Y | N | 0.41 | 2 | YA | N | Main database  | Y | N | 2 | 1 | 0.00  | 0.00 |
| Cronin         | 1996 | Y | N | 0.00 | 1 | YA | Y | Main database  | Y | N | 2 | 1 | 2.00  | 0.38 |
| Croom          | 2009 | Y | N | 0.42 | 1 | YA | Y | Main database  | Y | N | 3 | 1 | 6.50  | 1.38 |
| Cruz           | 2006 | Y | N | 0.52 | 1 | AD | N | Main database  | Y | N | . | 1 | 0.14  | 0.00 |
| Cunningham     | 2012 | Y | Y | 0.20 | 3 | AD | Y | Main database  | Y | Y | 1 | 6 | 1.00  | 5.39 |
| Daepfen        | 2011 | Y | N | 0.41 | 1 | YA | Y | Main database  | Y | Y | 3 | 3 | 6.00  | 3.38 |
| Darkes         | 1998 | Y | N | 0.23 | 2 | YA | Y | Main database  | Y | Y | . | 2 | 16.53 | 1.51 |
| Dearing        | 2008 | N | Y | 0.19 | 1 | YA | N | Main database  | Y | N | 1 | 1 | 0.00  | 0.00 |
| Dempster       | 2006 | N | N | 0.09 | 1 | AD | Y | Main database  | Y | Y | . | 1 | 0.43  | 0.85 |
| DiFulvio       | 2012 | N | N | 0.33 | 1 | YA | Y | Main database  | Y | Y | 4 | 1 | 0.00  | 1.25 |
| Dimeff         | 1997 | Y | N | 0.69 | 1 | YA | N | Main database  | Y | Y | . | 2 | 1.38  | 0.00 |
| Doumas         | 2008 | Y | N | 0.37 | 1 | YA | Y | Main database  | Y | Y | . | 1 | 9.00  | 2.07 |
| Doumas         | 2009 | Y | N | 0.36 | 1 | YA | Y | Main database  | Y | N | . | 1 | 4.75  | 0.00 |
| Doumas         | 2011 | Y | N | 0.78 | 1 | YA | Y | Main database  | Y | N | . | 1 | 1.50  | 0.28 |
| Eggleston      | 2007 | Y | Y | 0.12 | 1 | YA | N | Main database  | Y | Y | 1 | 1 | 0.17  | 0.00 |
| Ekman          | 2011 | Y | N | 0.76 | 2 | YA | Y | Main database  | Y | N | 3 | 3 | 2.00  | 2.09 |
| Ewing          | 2009 | Y | N | 0.10 | 1 | YA | Y | Main database  | Y | Y | . | 2 | 4.00  | 4.73 |
| Fischer Potts  | 2002 | N | N | 0.34 | 1 | YA | N | Main database  | Y | N | 0 | 1 | 0.08  | 0.00 |
| Fleming        | 2010 | Y | N | 0.00 | 2 | YA | Y | Main database  | Y | Y | . | 3 | 9.00  | 2.07 |
| Flórez Alarcón | 2009 | N | N | 0.00 | 2 | YA | Y | Main database  | N | N | . | 2 | 0.00  | 0.15 |
| Foxcroft       | 2009 | Y | Y | 0.17 | 2 | YA | Y | Main database  | Y | Y | 4 | 3 | 1.40  | 4.24 |
| Fried          | 2010 | Y | N | 0.32 | 1 | YA | Y | Other          | Y | Y | 2 | 2 | 0.00  | 0.00 |
| Fromme         | 2004 | Y | N | 0.11 | 2 | YA | Y | Main database  | Y | Y | . | 3 | 13.67 | 4.23 |
| Gallo          | 2007 | Y | N | 0.04 | 1 | YA | N | Main database  | Y | N | 1 | 1 | 0.00  | 0.00 |
| Gaume          | 2008 | Y | N | 0.13 | 1 | YA | Y | Other          | Y | Y | 3 | 5 | 0.00  | 0.00 |
| Gaume          | 2011 | Y | N | 0.11 | 1 | YA | Y | Main database  | Y | Y | 3 | 5 | 2.00  | 3.34 |
| Glassman       | 2010 | Y | Y | 0.68 | 1 | YA | Y | Main database  | Y | N | 2 | 2 | 0.33  | 3.47 |
| Glassman       | nd   | Y | Y | 0.58 | 1 | YA | N | Reference list | Y | N | 2 | 1 | .     | 0.00 |
| Gmel           | 2012 | N | Y | 0.00 | 1 | AD | Y | Reference list | N | Y | 1 | 2 | 0.33  | 2.24 |

|             |      |   |   |      |   |    |   |                |   |   |   |   |       |      |
|-------------|------|---|---|------|---|----|---|----------------|---|---|---|---|-------|------|
| Green       | 1998 | Y | N | 0.26 | 2 | YA | N | Main database  | Y | N | . | 1 | 0.00  | 0.00 |
| Gregory     | 2001 | Y | N | 0.25 | 1 | YA | N | Main database  | Y | N | 1 | 1 | 0.50  | 0.00 |
| Hagger      | 2012 | Y | N | 0.33 | 1 | YA | Y | Main database  | Y | Y | . | 1 | 2.50  | 2.63 |
| Hagger      | 2012 | Y | Y | 0.09 | 1 | YA | Y | Reference list | Y | Y | . | 1 | 7.00  | 1.99 |
| Hendershot  | 2010 | Y | N | 0.14 | 1 | YA | Y | Main database  | Y | Y | . | 1 | 2.67  | 3.98 |
| Henslee     | 2006 | Y | N | 0.33 | 1 | YA | Y | Main database  | Y | N | 2 | 1 | 1.00  | 0.42 |
| Henslee     | 2008 | Y | N | 0.39 | 1 | YA | N | Main database  | Y | N | 2 | 2 | 0.00  | 0.00 |
| Hester      | 2012 | Y | Y | 0.09 | 2 | YA | Y | Main database  | Y | Y | 1 | 1 | 5.00  | 2.09 |
| Hester      | 2012 | Y | Y | 0.00 | 1 | YA | Y | Main database  | Y | Y | 1 | 1 | 5.00  | 2.09 |
| Hogan       | 2005 | Y | Y | 0.19 | 1 | YA | N | Other          | Y | Y | . | 1 | 0.00  | 0.00 |
| Horner      | 2010 | Y | N | 0.33 | 3 | YA | N | Main database  | Y | N | . | 1 | 0.00  | 0.00 |
| Hosier      | 2002 | Y | Y | 0.00 | 3 | YA | N | Reference list | Y | Y | 3 | 1 | 0.27  | 0.00 |
| Howat       | 1991 | Y | N | 0.33 | 1 | YA | Y | Main database  | Y | N | . | 1 | 0.23  | 0.46 |
| Hunt        | 2004 | Y | N | 0.49 | 1 | YA | N | Main database  | Y | N | 0 | 1 | 0.67  | 0.00 |
| Hustad      | 2010 | Y | N | 0.00 | 1 | YA | Y | Other          | Y | Y | 2 | 1 | 14.00 | 2.13 |
| Ingersoll   | 2005 | Y | N | 0.18 | 2 | YA | Y | Main database  | Y | Y | . | 2 | 5.25  | 2.27 |
| Ivy         | 1998 | Y | N | 0.46 | 1 | YA | N | Main database  | Y | N | . | 1 | .     | 0.00 |
| Jewell      | 2005 | Y | N | 0.00 | 2 | YA | Y | Reference list | Y | N | . | 1 | 0.50  | 0.26 |
| Johnston    | 2002 | Y | Y | 0.20 | 2 | YA | Y | Reference list | Y | Y | 2 | 2 | 13.55 | 3.42 |
| Jones       | 1995 | N | N | 0.09 | 2 | YA | Y | Reference list | Y | N | . | 1 | 1.39  | 0.12 |
| Juarez      | 2001 | Y | Y | 0.23 | 1 | YA | Y | Reference list | Y | Y | 6 | 2 | 0.71  | 0.00 |
| Juarez      | 2006 | Y | Y | 0.40 | 1 | YA | Y | Main database  | Y | Y | 6 | 2 | 4.14  | 0.42 |
| Kazemi      | 2011 | N | N | 0.00 | 1 | YA | Y | Other          | Y | Y | . | 1 | 0.50  | 2.95 |
| Keillor     | 1999 | Y | N | 0.33 | 1 | YA | Y | Main database  | Y | N | . | 1 | 1.29  | 0.18 |
| Kerr-Corrêa | 2003 | N | N | 0.31 | 1 | YA | N | Other          | N | N | . | 1 | 0.40  | 0.00 |
| Koning      | 2009 | Y | Y | 0.05 | 2 | AD | Y | Main database  | Y | Y | 0 | 5 | 12.75 | 3.84 |
| Kulesza     | 2010 | Y | Y | 0.00 | 1 | YA | Y | Main database  | Y | N | . | 1 | 3.67  | 2.13 |
| Kypri       | 2004 | Y | Y | 0.08 | 1 | YA | Y | Main database  | Y | Y | 2 | 1 | 22.56 | 3.10 |
| Kypri       | 2009 | Y | Y | 0.23 | 2 | YA | Y | Main database  | Y | Y | 2 | 3 | 11.25 | 9.81 |
| Kypri       | 2013 | Y | Y | 0.22 | 1 | YA | Y | Other          | Y | Y | 2 | 1 | 0.00  | 4.75 |
| LaBrie      | 2002 | Y | Y | 0.32 | 1 | YA | N | Main database  | Y | N | . | 1 | 0.27  | 0.00 |

|                   |      |   |   |      |    |    |   |                |   |   |   |   |       |      |
|-------------------|------|---|---|------|----|----|---|----------------|---|---|---|---|-------|------|
| LaBrie            | 2008 | Y | N | 0.17 | 10 | YA | Y | Main database  | Y | Y | . | 2 | 5.60  | 1.71 |
| LaBrie            | 2008 | Y | Y | 0.32 | 2  | YA | Y | Main database  | Y | Y | 2 | 2 | 9.00  | 1.71 |
| LaBrie            | 2009 | Y | N | 0.09 | 11 | YA | Y | Main database  | Y | Y | . | 3 | 4.75  | 2.07 |
| LaBrie            | 2009 | Y | N | 0.62 | 1  | YA | Y | Main database  | Y | Y | 3 | 1 | 1.25  | 1.38 |
| Larimer           | 2001 | Y | Y | 0.27 | 1  | YA | Y | Main database  | Y | Y | . | 2 | 20.83 | 0.84 |
| Lau-Barraco       | 2008 | Y | N | 0.32 | 2  | YA | Y | Main database  | Y | Y | 3 | 2 | 9.80  | 1.71 |
| Leffingwell       | 2005 | Y | Y | 0.07 | 3  | YA | N | Reference list | Y | Y | . | 1 | 0.38  | 0.00 |
| Lewis             | 2007 | Y | N | 0.15 | 2  | YA | Y | Main database  | Y | Y | . | 1 | 9.50  | 1.75 |
| Lewis             | 2007 | Y | N | 0.11 | 1  | YA | Y | Main database  | Y | Y | 4 | 2 | 12.67 | 2.09 |
| Lewis             | 2008 | Y | N | 0.79 | 1  | YA | Y | Main database  | Y | Y | . | 1 | 3.00  | 1.71 |
| Lysaught          | 1998 | Y | N | 0.10 | 1  | YA | N | Main database  | Y | N | 1 | 2 | 0.00  | 0.00 |
| Magill            | 2012 | Y | Y | 0.20 | 6  | YA | Y | Other          | Y | Y | . | 1 | 0.00  | 2.32 |
| Maio              | 2005 | Y | N | 0.14 | 2  | AD | Y | Reference list | Y | Y | 4 | 2 | 7.75  | 2.78 |
| Marlatt           | 1998 | Y | Y | 0.18 | 5  | YA | Y | Main database  | Y | Y | 7 | 4 | 54.67 | 3.57 |
| Martell           | 2002 | Y | N | 0.34 | 1  | YA | N | Reference list | Y | N | 5 | 2 | .     | 0.00 |
| Martínez Martínez | 2008 | Y | N | 0.12 | 3  | AD | Y | Main database  | N | N | . | 1 | 1.80  | 0.00 |
| Martínez Martínez | 2008 | Y | Y | 0.00 | 1  | AD | Y | Reference list | N | N | . | 1 | 1.20  | 0.00 |
| Martínez Martínez | 2010 | Y | N | 0.50 | 3  | AD | Y | Other          | N | Y | 2 | 1 | 0.00  | 2.10 |
| Martins           | 2008 | Y | N | 0.11 | 1  | AD | N | Other          | N | N | 4 | 3 | .     | 0.00 |
| Mastroleo         | 2008 | Y | Y | 0.18 | 1  | YA | Y | Main database  | Y | Y | 1 | 3 | 0.20  | 0.00 |
| Mayhew            | 2008 | N | N | 0.27 | 1  | YA | Y | Main database  | Y | Y | 3 | 1 | 1.40  | 0.00 |
| Mayhew            | 2010 | Y | N | 0.57 | 1  | YA | N | Other          | Y | N | 1 | 1 | 0.00  | 0.00 |
| Mayhew            | 2011 | N | N | 0.17 | 1  | YA | Y | Reference list | Y | Y | 5 | 1 | 0.00  | 0.00 |
| McNally           | 2003 | Y | Y | 0.00 | 1  | YA | N | Main database  | Y | N | . | 2 | 0.10  | 0.00 |
| McNally           | 2003 | Y | N | 0.38 | 1  | YA | Y | Main database  | Y | N | . | 1 | 3.50  | 0.54 |
| McPherson         | 2012 | Y | N | 0.83 | 2  | YA | N | Other          | Y | N | 2 | 1 | 0.00  | 0.00 |
| Michael           | 2006 | Y | N | 0.00 | 1  | YA | Y | Main database  | Y | N | 2 | 1 | 2.86  | 1.08 |
| Mignogna          | 2010 | Y | N | 0.18 | 1  | YA | Y | Main database  | Y | N | 2 | 3 | 0.00  | 0.00 |
| Miller            | 2000 | Y | Y | 0.20 | 2  | YA | N | Main database  | Y | N | 2 | 1 | 2.00  | 0.00 |
| Moreira           | 2012 | Y | Y | 0.64 | 2  | YA | Y | Reference list | Y | N | 3 | 1 | 1.00  | 3.73 |
| Mundt             | 2007 | Y | N | 0.06 | 2  | YA | Y | Main database  | Y | Y | . | 3 | 0.25  | 0.00 |

|           |      |   |   |      |   |    |   |                |   |   |   |   |       |      |
|-----------|------|---|---|------|---|----|---|----------------|---|---|---|---|-------|------|
| Murgraff  | 2006 | Y | N | 0.43 | 2 | YA | Y | Reference list | Y | Y | . | 2 | 0.14  | 0.00 |
| Murphy    | 2001 | Y | N | 0.24 | 2 | YA | Y | Main database  | Y | N | . | 1 | 14.92 | 1.14 |
| Murphy    | 2010 | Y | Y | 0.16 | 3 | YA | Y | Main database  | Y | Y | . | 2 | 5.67  | 2.10 |
| Mushquash | 2011 | N | N | 0.38 | 1 | AD | N | Reference list | Y | Y | . | 5 | 0.00  | 0.00 |
| Neal      | 2004 | Y | N | 0.00 | 1 | YA | Y | Main database  | Y | Y | . | 1 | 8.11  | 1.66 |
| Neighbors | 2004 | Y | Y | 0.18 | 2 | YA | Y | Main database  | Y | Y | . | 1 | 34.78 | 4.23 |
| Neighbors | 2005 | Y | Y | 0.47 | 1 | YA | Y | Main database  | Y | Y | . | 1 | 5.63  | 1.00 |
| Neighbors | 2006 | Y | N | 0.09 | 1 | YA | Y | Main database  | Y | Y | . | 1 | 14.57 | 3.69 |
| Neighbors | 2009 | Y | Y | 0.04 | 1 | YA | Y | Main database  | Y | Y | 2 | 1 | 12.25 | 4.46 |
| Neighbors | 2010 | Y | Y | 0.00 | 4 | YA | Y | Main database  | Y | Y | 5 | 2 | 8.00  | 5.23 |
| Neighbors | 2011 | Y | Y | 0.07 | 2 | YA | Y | Other          | Y | Y | 3 | 1 | 2.00  | 1.24 |
| Neighbors | 2012 | Y | Y | 0.07 | 1 | YA | Y | Other          | Y | Y | 3 | 1 | 1.00  | 5.01 |
| Ostafin   | 2004 | Y | N | 0.02 | 1 | YA | Y | Main database  | Y | N | . | 2 | 0.00  | 0.00 |
| Ostafin   | 2012 | Y | N | 0.02 | 1 | YA | Y | Other          | Y | N | . | 2 | 1.00  | 1.93 |
| Palfai    | 2011 | Y | N | 0.19 | 1 | YA | Y | Main database  | Y | Y | . | 1 | 2.00  | 2.09 |
| Paschall  | 2006 | Y | N | 0.44 | 1 | YA | Y | Reference list | Y | Y | . | 2 | 3.00  | 1.23 |
| Paschall  | 2011 | Y | Y | 0.55 | 2 | YA | Y | Other          | Y | Y | 3 | 2 | 3.00  | 4.04 |
| Patel     | 2011 | Y | N | 0.55 | 2 | YA | N | Main database  | Y | Y | 4 | 1 | 0.00  | 0.00 |
| Pedersen  | 2012 | Y | N | 0.13 | 4 | YA | N | Other          | Y | Y | 1 | 1 | 1.00  | 4.85 |
| Peeler    | 2000 | Y | N | 0.44 | 1 | YA | Y | Main database  | Y | Y | . | 2 | 3.54  | 0.69 |
| Pensuksan | 2010 | N | Y | 0.00 | 2 | YA | Y | Main database  | Y | Y | . | 1 | 0.00  | 2.41 |
| Quigley   | 2010 | Y | Y | 0.00 | 1 | YA | N | Other          | Y | N | . | 1 | 0.00  | 0.00 |
| Quigley   | 2010 | Y | Y | 0.28 | 1 | AD | N | Other          | Y | N | . | 1 | 0.00  | 0.00 |
| Reilly    | 2008 | Y | N | 0.45 | 1 | YA | Y | Main database  | Y | N | 7 | 1 | 1.40  | 1.66 |
| Reynolds  | 1995 | Y | N | 0.07 | 1 | YA | Y | Main database  | Y | Y | . | 1 | 1.83  | 0.46 |
| Schaus    | 2009 | Y | N | 0.29 | 4 | YA | Y | Main database  | Y | Y | 3 | 1 | 13.25 | 2.07 |
| Schreiner | 2010 | N | N | 0.48 | 1 | YA | N | Other          | Y | N | 1 | 1 | 0.67  | 0.00 |
| Segatto   | 2008 | Y | Y | 0.00 | 1 | YA | Y | Other          | N | N | 6 | 2 | .     | 0.00 |
| Sharmer   | 2001 | Y | N | 0.29 | 3 | YA | Y | Reference list | Y | N | 1 | 2 | 2.08  | 0.37 |
| Simão     | 2005 | N | N | 0.12 | 1 | YA | N | Other          | N | N | 2 | 1 | 0.00  | 0.00 |
| Simão     | 2008 | Y | N | 0.15 | 2 | YA | Y | Main database  | Y | Y | 4 | 2 | 3.00  | 2.14 |

|                 |      |   |   |      |    |    |   |                |   |   |   |   |       |       |
|-----------------|------|---|---|------|----|----|---|----------------|---|---|---|---|-------|-------|
| Sivasithamparam | 2008 | Y | Y | 0.79 | 1  | YA | N | Reference list | Y | N | . | 1 | 0.40  | 0.00  |
| Smith           | 2004 | Y | N | 0.47 | 1  | YA | Y | Main database  | Y | N | . | 1 | 0.67  | 0.68  |
| Smith           | 2006 | Y | N | 0.62 | 1  | YA | Y | Main database  | Y | Y | 2 | 1 | 3.29  | 2.01  |
| Spijkerman      | 2010 | Y | Y | 0.00 | 2  | YA | Y | Main database  | Y | Y | . | 1 | 5.00  | 4.66  |
| Spirito         | 2004 | Y | Y | 0.18 | 3  | AD | Y | Main database  | Y | Y | 0 | 9 | 11.93 | 3.23  |
| Stachula        | 2004 | Y | N | 0.71 | 1  | YA | N | Main database  | Y | N | 2 | 1 | 0.11  | 0.00  |
| Stahlbrandt     | 2007 | Y | Y | 0.35 | 1  | YA | Y | Main database  | Y | Y | 7 | 2 | 4.17  | 3.18  |
| Stamper         | 2004 | Y | N | 0.43 | 1  | YA | Y | Main database  | Y | N | . | 1 | 2.22  | 0.68  |
| Stamper         | 2006 | Y | N | 0.46 | 1  | YA | N | Main database  | Y | N | 5 | 1 | 0.29  | 0.00  |
| Steffian        | 1997 | N | N | 0.00 | 2  | YA | Y | Reference list | Y | N | . | 2 | 5.14  | 0.00  |
| Sugarman        | 2009 | Y | Y | 0.00 | 1  | YA | Y | Main database  | Y | N | . | 1 | 2.00  | 2.68  |
| Sugarman        | 2009 | Y | N | 0.44 | 2  | YA | N | Main database  | Y | Y | . | 1 | 0.00  | 0.00  |
| Terlecki        | 2011 | Y | N | 0.19 | 1  | YA | Y | Main database  | Y | Y | 0 | 5 | 0.90  | 0.38  |
| Terlecki        | 2011 | Y | Y | 0.09 | 4  | YA | N | Other          | Y | Y | 1 | 1 | 0.00  | 0.00  |
| Terry           | 2012 | Y | Y | 0.20 | 2  | YA | N | Other          | Y | Y | 1 | 1 | 0.00  | 0.00  |
| Thush           | 2009 | Y | N | 0.18 | 2  | AD | Y | Main database  | Y | Y | . | 1 | 4.00  | 2.68  |
| Turrisi         | 2009 | Y | Y | 0.18 | 1  | YA | Y | Main database  | Y | Y | 3 | 7 | 14.25 | 2.07  |
| Voogt           | 2013 | Y | Y | 0.00 | 30 | YA | Y | Other          | Y | Y | 2 | 2 | .     | 1.96  |
| Wagener         | 2010 | Y | N | 0.05 | 1  | YA | Y | Reference list | Y | N | 2 | 3 | 0.50  | 0.00  |
| Wagener         | 2012 | Y | N | 0.08 | 1  | YA | Y | Main database  | Y | N | 2 | 3 | 2.00  | 3.14  |
| Walters         | 2000 | Y | N | 0.14 | 1  | YA | Y | Main database  | Y | Y | . | 2 | 9.46  | 0.51  |
| Walters         | 2000 | Y | N | 0.27 | 1  | YA | Y | Main database  | Y | Y | . | 2 | 8.08  | 1.59  |
| Walters         | 2007 | Y | Y | 0.00 | 2  | YA | Y | Main database  | Y | Y | . | 2 | 4.17  | 3.34  |
| Walters         | 2009 | Y | Y | 0.19 | 3  | YA | Y | Main database  | Y | Y | 2 | 7 | 13.75 | 4.46  |
| Walton          | 2010 | Y | Y | 0.00 | 3  | AD | Y | Main database  | Y | Y | 1 | 6 | 23.33 | 30.01 |
| Weaver          | 2011 | Y | Y | 0.04 | 1  | YA | N | Other          | Y | N | . | 1 | 0.00  | 0.00  |
| Weitzel         | 2007 | Y | Y | 0.00 | 1  | YA | Y | Main database  | Y | Y | . | 2 | 5.33  | 2.09  |
| Werch           | 1996 | Y | Y | 0.04 | 2  | AD | Y | Main database  | Y | Y | . | 1 | 2.00  | 1.27  |
| Werch           | 2002 | Y | N | 0.08 | 1  | AD | Y | Main database  | Y | Y | 3 | 2 | 0.31  | 0.00  |
| Werch           | 2005 | Y | N | 0.13 | 1  | AD | Y | Main database  | Y | Y | 3 | 1 | 0.88  | 2.08  |
| Werch           | 2005 | Y | N | 0.03 | 1  | AD | Y | Main database  | Y | Y | 4 | 1 | 1.38  | 0.98  |

|           |      |   |   |      |   |    |   |                |   |   |   |   |      |      |
|-----------|------|---|---|------|---|----|---|----------------|---|---|---|---|------|------|
| White     | 2008 | Y | Y | 0.00 | 2 | YA | Y | Main database  | Y | Y | 2 | 1 | 4.60 | 1.71 |
| Whiteside | 2010 | Y | N | 0.12 | 2 | YA | N | Main database  | Y | N | 2 | 1 | 0.33 | 0.00 |
| Wiers     | 2004 | Y | Y | 0.00 | 1 | YA | Y | Reference list | Y | N | . | 2 | 7.89 | 1.66 |
| Winters   | 2012 | N | Y | 0.01 | 1 | AD | Y | Other          | Y | Y | . | 3 | 2.00 | 3.14 |
| Wood      | 2007 | Y | N | 0.33 | 3 | YA | Y | Main database  | Y | Y | . | 3 | 6.33 | 1.75 |
| Wood      | 2010 | Y | Y | 0.29 | 2 | YA | Y | Main database  | Y | Y | . | 3 | 6.67 | 5.23 |
| Wooten    | 1995 | Y | N | 0.00 | 2 | AD | N | Main database  | Y | N | . | 1 | 0.33 | 0.00 |
| Zhang     | 2009 | N | Y | 0.00 | 2 | AD | N | Other          | Y | N | 4 | 1 | 0.25 | 0.00 |

Notes: Y = Yes, N = No, AD = AD, YA = YA, ITT = intent to treat, . = data not available/not applicable.
